# Supplementary material for: Green alternative cosolvents to N-methyl-2-pyrrolidone in water polyurethane dispersions
Source: Royal Society of Chemistry journal article supplement (doi:10.1039/d1ra03157k), 2021-01-01
Supplement: d1ra03157k1.pdf [file d1ra03157k1.pdf]

## Green alternative cosolvents to NMP in water polyurethane dispersions (PUD).

Lorena Germán, José María Cuevas, Ruben Cobos, Leyre Pérez-Alvarez, José Luis Vilas-Vilela

### Supplementary information

#### Solvents Health, Environmental and Safety (HES) information

Health, environmental impact and safety data of N-Methyl-2-pyrrolidone (NMP) and alternative green solvents: Dihydrolevoglucosenone (CY) and  $\gamma$ -Valerolactone (GVL) are summarized in Table S1. Scores are assigned on a scale from 1 to 10, with the intent that the solvent rated the least green in a category has score equal to 1, and that rated the greenest has score equal to 10.

All this information is based on following solvent selection guides:

- CHEM21 Innovative Medicines Initiative (IMI)-CHEM21 public- private partnership is a European consortium which promotes sustainable biological and chemical methodologies.
- GSK's solvent sustainability guide.

Table S1. Data about health, environmental impact and safety of solvents<sup>1 2 3 4</sup>

| SOLVENT | Boiling point(°C) | Health Hazard | Exposure potential | Aquatic impact | Air impact | Reactivity and stability |
|---------|-------------------|---------------|--------------------|----------------|------------|--------------------------|
| NMP     | 202               | 1             | 9                  | 10             | 6          | 10                       |
| CY      | 203               | 4             | 8                  | 9              | 6          | 10                       |
| GVL     | 207               | 4             | 8                  | 10             | 6          | 10                       |

#### Characterization of PUDs

##### Conversion of NCO groups by Fourier-Transform Infrared spectroscopy (FTIR)

Quantification of the conversion of NCO groups is based on Beer-Lambert law and calculated from decay in the corresponding absorbance. The area below the isocyanate stretch peak located at  $\sim 2260\text{ cm}^{-1}$ , thus, is measured, and the result is normalized with respect to the area below the C-H stretch peaks between  $\sim 2840$  and  $\sim 3050\text{ cm}^{-1}$ . The conversion of the isocyanate functional group as a function of time was calculated from

$$\text{Conversion} = 1 - \frac{A_t}{A_0}$$

where  $A_t$  is the normalized area under the isocyanate peak at different reaction times  $t$  and  $A_0$  is the initial normalized area under the isocyanate peak ( $t=0$ )<sup>5 6</sup>.

Table S2. Experimental data of NCO conversion analysis.

| NCO Conversion* |           |           |           |
|-----------------|-----------|-----------|-----------|
| TIME            | PUD_NMP   | PUD_CY    | PUD_GVL   |
| 0               | 0.00      | 0.00      | 0.00      |
| 150             | 0.67±0.04 | 0.57±0.01 | 0.65±0.01 |
| 180             | 0.76±0.03 | 0.650.03± | 0.71±0.01 |
| 270             | 0.91±0.03 | 0.86±0.05 | 0.92±0.02 |

\* Values are mean of three replicates

**Polyurethane films**

Film fabrication

Fabrication of polyurethane transparent films, Figure S1.

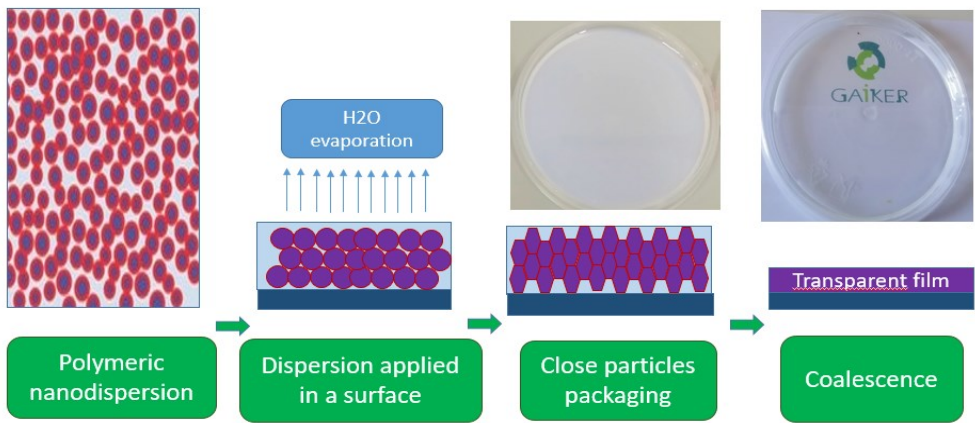

Figure S1. PUD forming transparent films.

Atomic Force Microscopy (AFM) surface quality

Surface topography of polyurethane films (Table S3).

Table S3. AFM images of polyurethane films surfaces

| HEIGHT IMAGE                                                                        |  | PHASE IMAGE                                                                          |  |
|-------------------------------------------------------------------------------------|--|--------------------------------------------------------------------------------------|--|
| 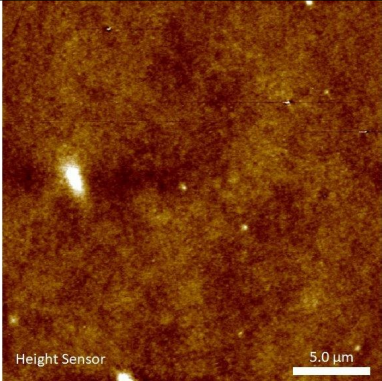   |  |    |  |
| PUD_NMP                                                                             |  |                                                                                      |  |
|   |  |   |  |
| PUD_CY                                                                              |  |                                                                                      |  |
|  |  |  |  |
| PUD_GVL                                                                             |  |                                                                                      |  |

Dynamic mechanical analysis (DMA)

Dynamic mechanical thermal properties measured by DMA..

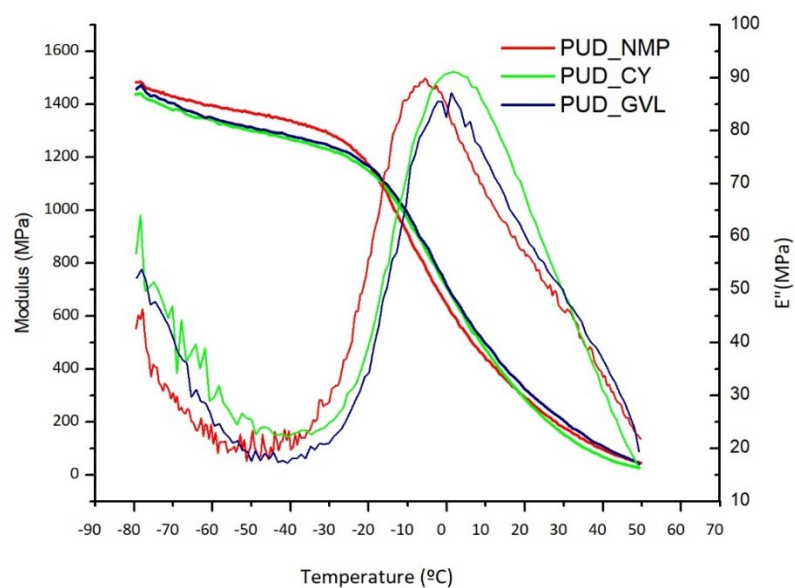

Figure S2. DMA of PU materials synthesized with different cosolvent.

#### References

- 1 D. Prat, A. Wells, J. Hayler, H. Sneddon, C. R. McElroy, S. Abou-Shehadeh and P. J. Dunn, *Green Chem.*, 2015, **18**, 288–296.
- 2 C. M. Alder, J. D. Hayler, R. K. Henderson, A. M. Redman, L. Shukla, L. E. Shuster and H. F. Sneddon, *Green Chem.*, 2016, **18**, 3879–3890.
- 3 F. P. Byrne, S. Jin, G. Paggiola, T. H. M. Petchey, J. H. Clark, T. J. Farmer, A. J. Hunt, C. Robert McElroy and J. Sherwood, *Sustain. Chem. Process.*, 2016, **4**, 1–24.
- 4 D. S. van Es; Report 1742; November 20th, 2017; Wageningen Food & Biobased Research
- 5 C. A. Cateto, M. F. Barreiro and A. E. Rodrigues, *Ind. Crops Prod.*, 2008, **27**, 168–174.
- 6 M. Ocepek, J. Zabret, J. Kecelj, P. Venturini and J. Golob, *Mater. Tehnol.*, 2015, **49**, 495–501.
